# Supplementary material for: Relationships among Socioeconomic Factors and Self-rated Health in Japanese Adults: NIPPON DATA2010
Source: PubMed Central journal article supplement (PMC5825690; doi:10.2188/jea.je20170246), 2018-03-05
Supplement: je-28-S066-s001.pdf [file je-28-S066-s001.pdf]

**eTable 1.** Relationships among age and socioeconomic status in men (n=1,178): NIPPON DATA2010

| SES                                                    | Age, years<br>N | 20–29<br>51 | 30–39<br>106 | 40–49<br>122 | 50–59<br>189 | 60–69<br>354 | 70–79<br>264 | ≥80<br>92 | P value |
|--------------------------------------------------------|-----------------|-------------|--------------|--------------|--------------|--------------|--------------|-----------|---------|
| Educational attainment <sup>i</sup>                    |                 |             |              |              |              |              |              |           |         |
| Elementary or junior high school                       |                 | 3 (6%)      | 3 (3%)       | 3 (2%)       | 25 (13%)     | 99 (28%)     | 103 (39%)    | 54 (59%)  | <0.001  |
| High school                                            |                 | 18 (35%)    | 46 (43%)     | 58 (48%)     | 87 (46%)     | 169 (48%)    | 102 (39%)    | 16 (17%)  |         |
| University or junior college                           |                 | 30 (59%)    | 56 (53%)     | 61 (50%)     | 75 (40%)     | 83 (23%)     | 57 (22%)     | 21 (23%)  |         |
| Marital/living status                                  |                 |             |              |              |              |              |              |           |         |
| Married                                                |                 | 11 (22%)    | 79 (75%)     | 94 (77%)     | 159 (84%)    | 297 (84%)    | 236 (89%)    | 77 (84%)  | <0.001  |
| Single, not living alone                               |                 | 34 (67%)    | 17 (16%)     | 18 (15%)     | 11 (6%)      | 16 (5%)      | 7 (3%)       | 9 (10%)   |         |
| Single, living alone                                   |                 | 6 (12%)     | 10 (9%)      | 10 (8%)      | 19 (10%)     | 41 (12%)     | 21 (8%)      | 6 (7%)    |         |
| Working status                                         |                 |             |              |              |              |              |              |           |         |
| Working                                                |                 | 43 (84%)    | 102 (96%)    | 116 (95%)    | 170 (90%)    | 197 (56%)    | 78 (30%)     | 12 (13%)  | <0.001  |
| Not working, including housemaking exclusively         |                 | 8 (16%)     | 4 (4%)       | 6 (5%)       | 19 (10%)     | 157 (44%)    | 186 (70%)    | 80 (87%)  |         |
| Yearly household income, million JPY                   |                 |             |              |              |              |              |              |           |         |
| Less than 2                                            |                 | 2 (4%)      | 6 (6%)       | 10 (8%)      | 27 (14%)     | 76 (21%)     | 57 (22%)     | 17 (18%)  | <0.001  |
| 2 through 6                                            |                 | 28 (55%)    | 70 (66%)     | 56 (46%)     | 90 (48%)     | 195 (55%)    | 164 (62%)    | 52 (57%)  |         |
| Greater than 6                                         |                 | 10 (20%)    | 22 (21%)     | 46 (38%)     | 60 (32%)     | 46 (13%)     | 28 (11%)     | 12 (13%)  |         |
| Invalid response                                       |                 | 11 (22%)    | 8 (8%)       | 10 (8%)      | 12 (6%)      | 37 (10%)     | 15 (6%)      | 11 (12%)  |         |
| Equivalent monthly household expenditure <sup>ii</sup> |                 |             |              |              |              |              |              |           |         |
| 1st quintile (Lowest)                                  |                 | 8 (16%)     | 20 (19%)     | 26 (21%)     | 34 (18%)     | 71 (20%)     | 40 (15%)     | 18 (20%)  | 0.436   |
| 2nd quintile                                           |                 | 13 (25%)    | 33 (31%)     | 21 (17%)     | 39 (21%)     | 66 (19%)     | 50 (19%)     | 22 (24%)  |         |
| 3rd quintile                                           |                 | 12 (24%)    | 23 (22%)     | 22 (18%)     | 35 (19%)     | 74 (21%)     | 57 (22%)     | 15 (16%)  |         |
| 4th quintile                                           |                 | 7 (14%)     | 12 (11%)     | 21 (17%)     | 41 (22%)     | 61 (17%)     | 62 (23%)     | 12 (13%)  |         |
| 5th quintile (Highest)                                 |                 | 10 (20%)    | 16 (15%)     | 23 (19%)     | 33 (17%)     | 66 (19%)     | 46 (17%)     | 20 (22%)  |         |

JPY, Japanese yen; SES, socioeconomic status.

Number of missing responses: i = 9; ii = 49.

P values were calculated with the chi-squared test.

**eTable 2.** Relationships among age and socioeconomic status in women (n=1,555): NIPPON DATA2010

| SES                                                    | Age, years<br>N | 20–29    | 30–39     | 40–49     | 50–59     | 60–69     | 70–79     | ≥80      | P value |
|--------------------------------------------------------|-----------------|----------|-----------|-----------|-----------|-----------|-----------|----------|---------|
| Educational attainment <sup>i</sup>                    |                 |          |           |           |           |           |           |          |         |
| Elementary or junior high school                       |                 | 7 (11%)  | 7 (3%)    | 10 (6%)   | 25 (9%)   | 127 (31%) | 144 (46%) | 46 (46%) | <0.001  |
| High school                                            |                 | 23 (37%) | 83 (37%)  | 71 (40%)  | 130 (49%) | 222 (55%) | 133 (42%) | 46 (46%) |         |
| University or junior college                           |                 | 32 (52%) | 134 (60%) | 98 (55%)  | 111 (42%) | 58 (14%)  | 37 (12%)  | 7 (7%)   |         |
| Marital/living status                                  |                 |          |           |           |           |           |           |          |         |
| Married                                                |                 | 14 (23%) | 185 (83%) | 146 (82%) | 225 (84%) | 320 (79%) | 184 (58%) | 26 (26%) | <0.001  |
| Single, not living alone                               |                 | 47 (76%) | 31 (14%)  | 26 (15%)  | 27 (10%)  | 46 (11%)  | 49 (16%)  | 32 (32%) |         |
| Single, living alone                                   |                 | 1 (2%)   | 8 (4%)    | 7 (4%)    | 15 (6%)   | 41 (10%)  | 82 (26%)  | 43 (43%) |         |
| Working status                                         |                 |          |           |           |           |           |           |          |         |
| Working                                                |                 | 45 (73%) | 126 (56%) | 127 (71%) | 184 (69%) | 136 (33%) | 51 (16%)  | 3 (3%)   | <0.001  |
| Not working, including housemaking exclusively         |                 | 17 (27%) | 98 (44%)  | 52 (29%)  | 83 (31%)  | 271 (67%) | 264 (84%) | 98 (97%) |         |
| Yearly household income, million JPY                   |                 |          |           |           |           |           |           |          |         |
| Less than 2                                            |                 | 10 (16%) | 18 (8%)   | 11 (6%)   | 31 (12%)  | 88 (22%)  | 104 (33%) | 34 (34%) | <0.001  |
| 2 through 6                                            |                 | 26 (42%) | 129 (58%) | 84 (47%)  | 124 (46%) | 232 (57%) | 148 (47%) | 51 (50%) |         |
| Greater than 6                                         |                 | 13 (21%) | 57 (25%)  | 69 (39%)  | 83 (31%)  | 40 (10%)  | 28 (9%)   | 4 (4%)   |         |
| Invalid response                                       |                 | 13 (21%) | 20 (9%)   | 15 (8%)   | 29 (11%)  | 47 (12%)  | 35 (11%)  | 12 (12%) |         |
| Equivalent monthly household expenditure <sup>ii</sup> |                 |          |           |           |           |           |           |          |         |
| 1st quintile (Lowest)                                  |                 | 8 (13%)  | 44 (20%)  | 16 (9%)   | 35 (13%)  | 70 (17%)  | 87 (28%)  | 18 (18%) | <0.001  |
| 2nd quintile                                           |                 | 11 (18%) | 52 (23%)  | 31 (17%)  | 39 (15%)  | 72 (18%)  | 62 (20%)  | 14 (14%) |         |
| 3rd quintile                                           |                 | 15 (24%) | 47 (21%)  | 36 (20%)  | 60 (22%)  | 96 (24%)  | 46 (15%)  | 20 (20%) |         |
| 4th quintile                                           |                 | 10 (16%) | 40 (18%)  | 46 (26%)  | 52 (19%)  | 74 (18%)  | 49 (16%)  | 18 (18%) |         |
| 5th quintile (Highest)                                 |                 | 17 (27%) | 28 (13%)  | 42 (23%)  | 67 (25%)  | 72 (18%)  | 54 (17%)  | 24 (24%) |         |

JPY, Japanese yen; SES, socioeconomic status.

Number of missing responses: i = 4; ii = 83.

P values were calculated with the chi-squared test.
